# Supplementary material for: Mitochondrial malfunction and atrophy of astrocytes in the aged human cerebral cortex
Source: PubMed Central journal article supplement (PMC10725430; doi:10.1038/s41467-023-44192-0), 2023-12-16
Supplement: 41467_2023_44192_MOESM1_ESM.pdf [file 41467_2023_44192_MOESM1_ESM.pdf]

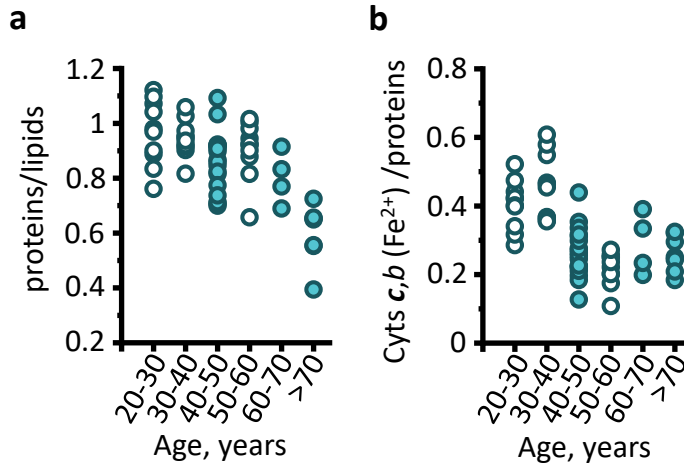

**Supplementary Figure 1. Age- and sex-dependency of metabolic changes in human astrocytes.**

**a.** The ratio of proteins to lipids. **b.** The relative amount of reduced cytochromes of *c,b*-types. Data obtained from individual cells ( $n = 58$ ) of 7 patients at different ages. Empty circles are females, filled circles are males.

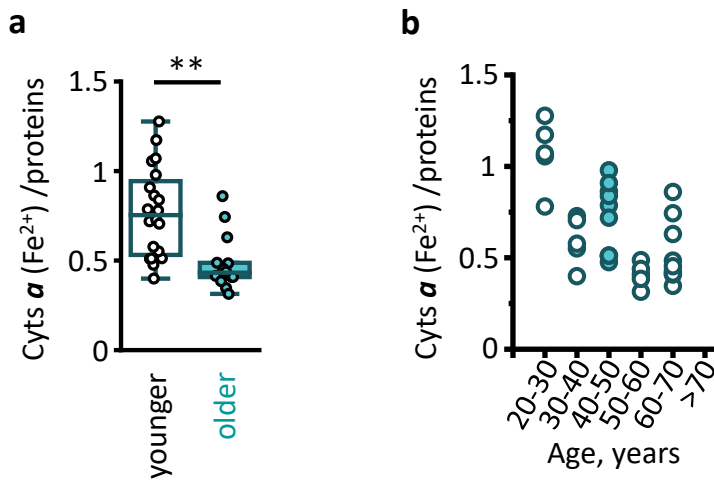

**Supplementary Figure 2. Age- and sex-dependency of changes in astrocytic  $\alpha$ -type cytochromes.**

The relative amount of reduced cytochromes of  $\alpha$ -types in two age groups (**a**) and in individual patients at different ages (**b**).

Data obtained from individual cells ( $n = 34$ ) of 7 patients at different ages. Empty circles are females, filled circles are males. Mann-Whitney test: \*\* –  $p < 0.01$ .

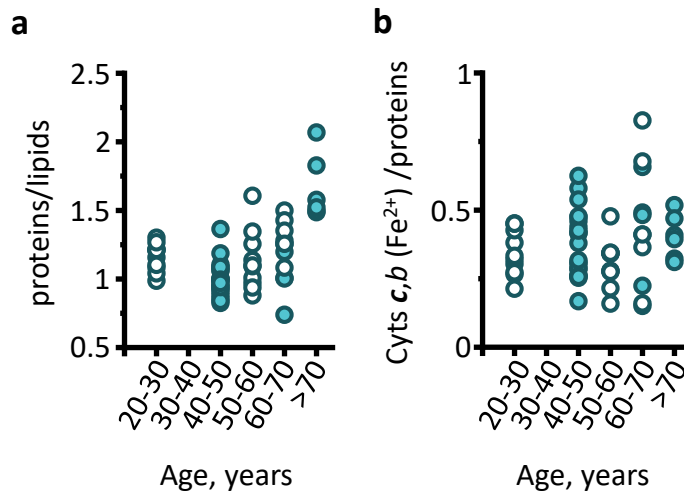

**Supplementary Figure 3. Age- and sex-dependency of metabolic changes in human neurons.**

**a.** The ratio of proteins to lipids. **b.** The relative amount of reduced cytochromes of *c,b*-types. Data obtained from individual cells (n = 58) of 7 patients at different ages. Empty circles are females, filled circles are males.

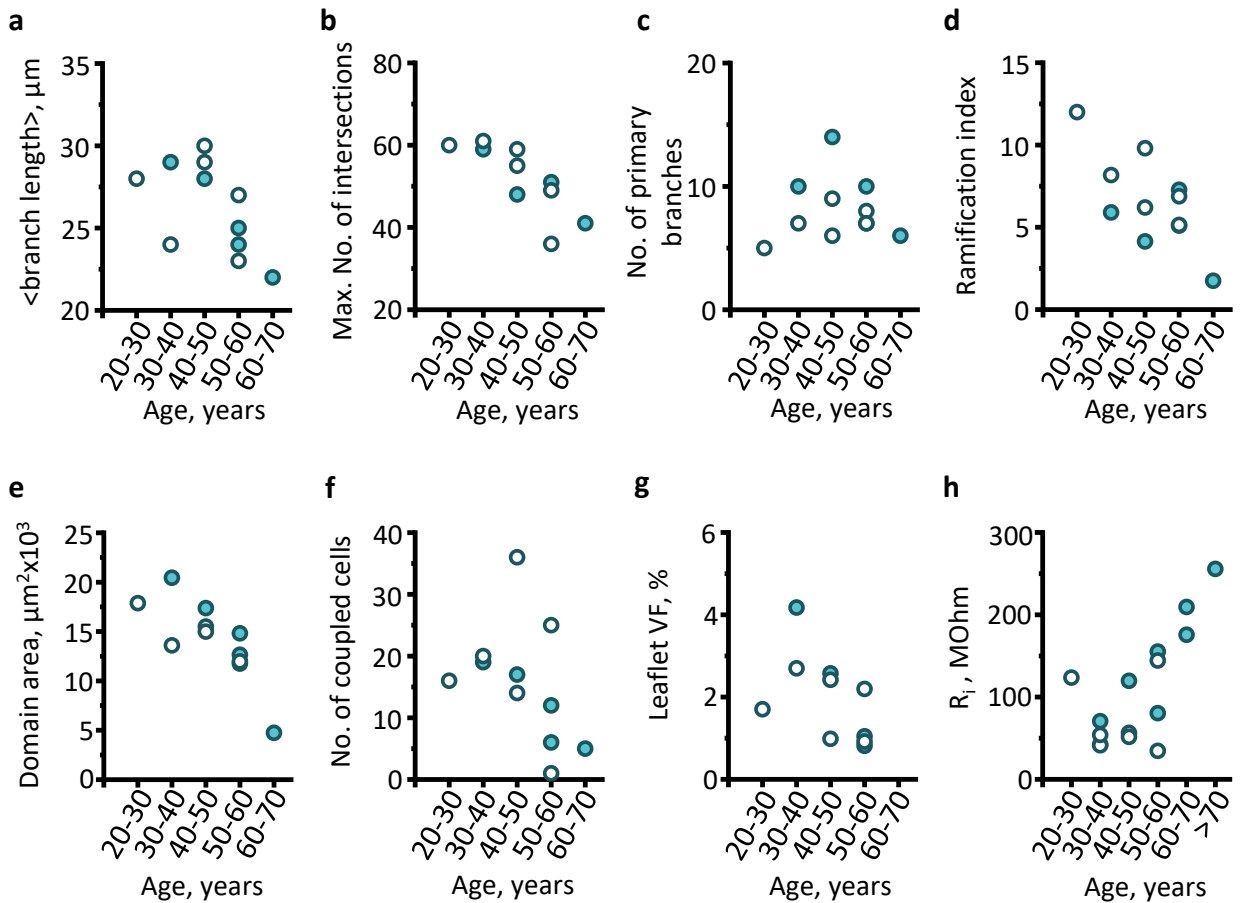

#### Supplementary Figure 4. Age- and sex-dependency of astrocytic atrophy.

The results of 3D Sholl analysis of cortical astrocytes in 11 patients at different ages: **a**. mean branch lengths, **b**. maximum numbers of intersections, **c**. numbers of primary branches, and **d**. ramification indexes. **e**. Astrocytic domain areas in 11 patients at different ages. **f**. Numbers of coupled astrocytes in 11 patients at different ages. **g**. Volume fractions (VF) of astrocytic leaflets in 11 patients at different ages. **h**. Input resistances ( $R_i$ ) of astrocytes in 13 patients (15 cells) at different ages.

Data obtained from individual cells. One cell per patient, except for panel h. Empty circles are females, filled circles are males.

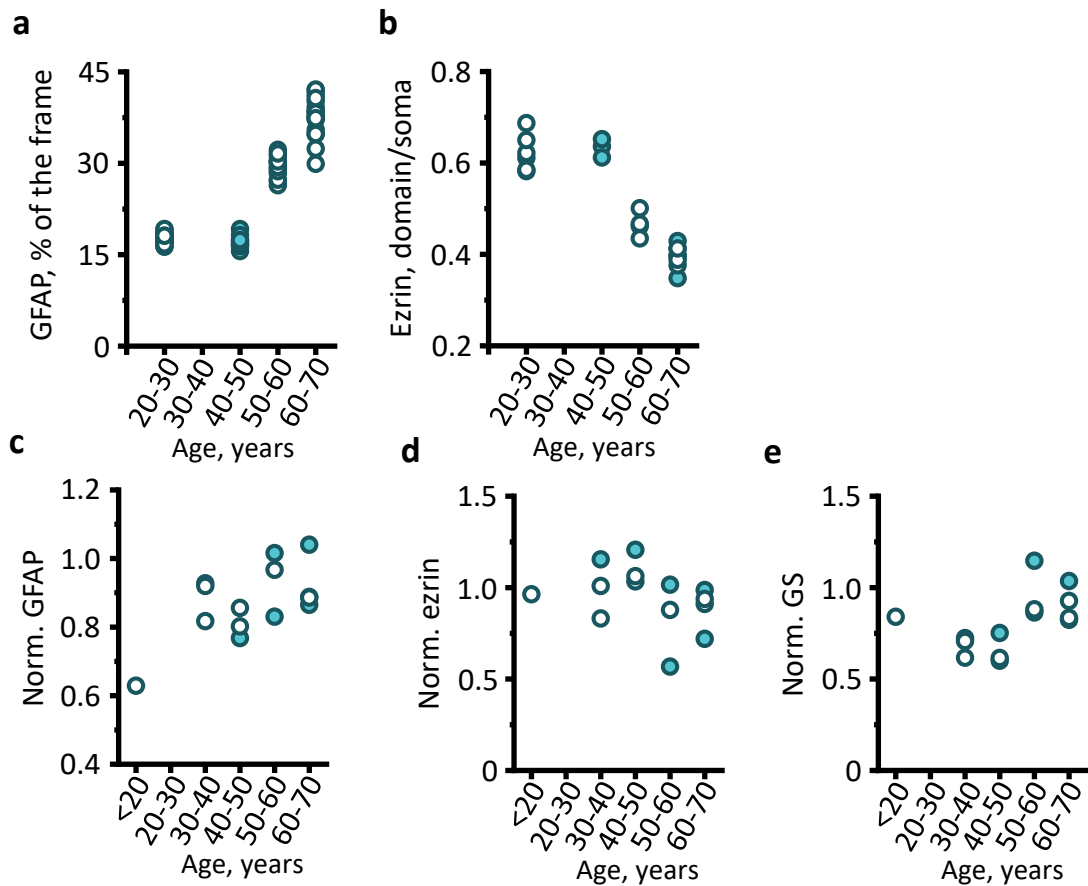

**Supplementary Figure 5. Age- and sex-dependency of GFAP and GS upregulation, and Ezrin deficiency.**

**a.** Percentage of the image covered by pixels stained for GFAP in 7 patients at different ages. Several images were taken for each patient, n = 58 in total. **b.** Ezrin immunostaining intensity averaged in the astrocyte territorial domain and normalized to the immunostaining intensity of soma in 7 patients at different ages. Several cells were taken for each patient, n = 21 in total. **c.** Western blot: GFAP amount normalized to total protein amount in 14 patients at different ages. Number of blots is equal to the number of patients. **d,e.** same as c. but for ezrin (d) and glutamine synthetase (e, GS)  
Empty circles are females, filled circles are males.

**a**

younger

older

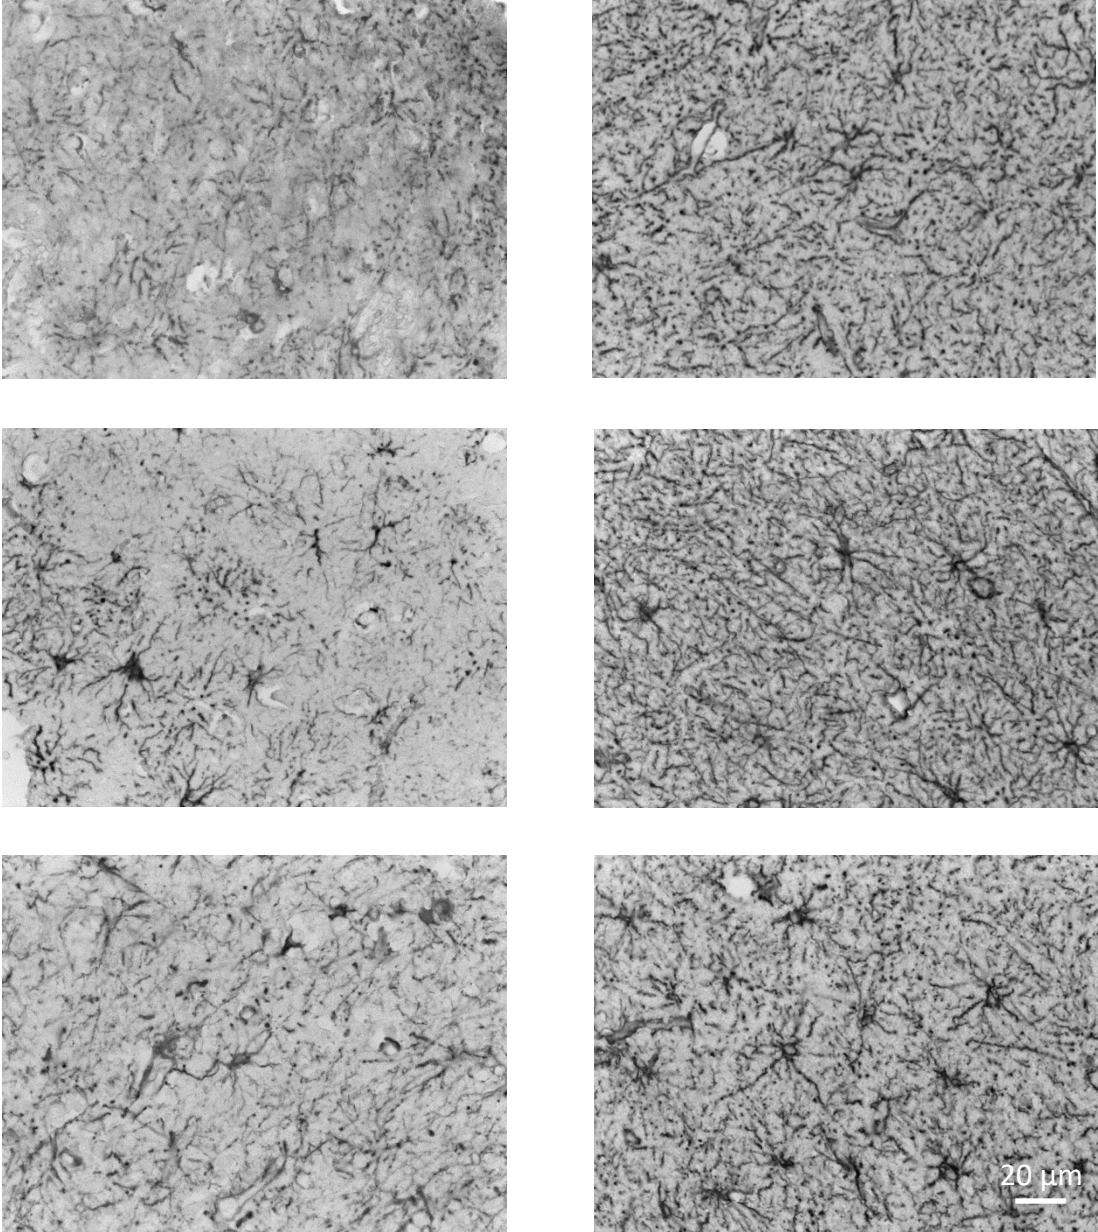**b**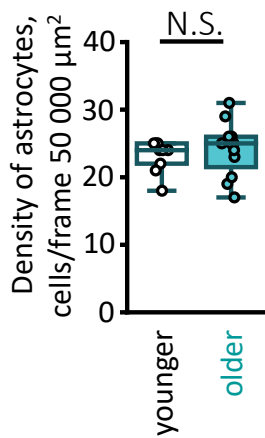

**Supplementary Figure 6. Aging does not affect the density of GFAP-expressing astrocytes.**

**a.** Representative GFAP immunostainings of cortical astrocytes in three younger adults (left column) and three older adults (right column). **b.** Summary plot showing no significant difference in the density of GFAP-positive astrocytes in two age groups ( $p = 0.33$ ; younger adults:  $N = 3$  people [ $n = 9$  images]; older adults:  $N = 4$  people [ $n = 12$  images]).

Data are shown as box-and-whisker plots where the box is Q1 and Q3 with median, whiskers are the ranges within 1.5IQR. Empty boxes/circles – younger adults, filled boxes/circles – older adults. Mann-Whitney test. N.S. –  $p > 0.05$ .

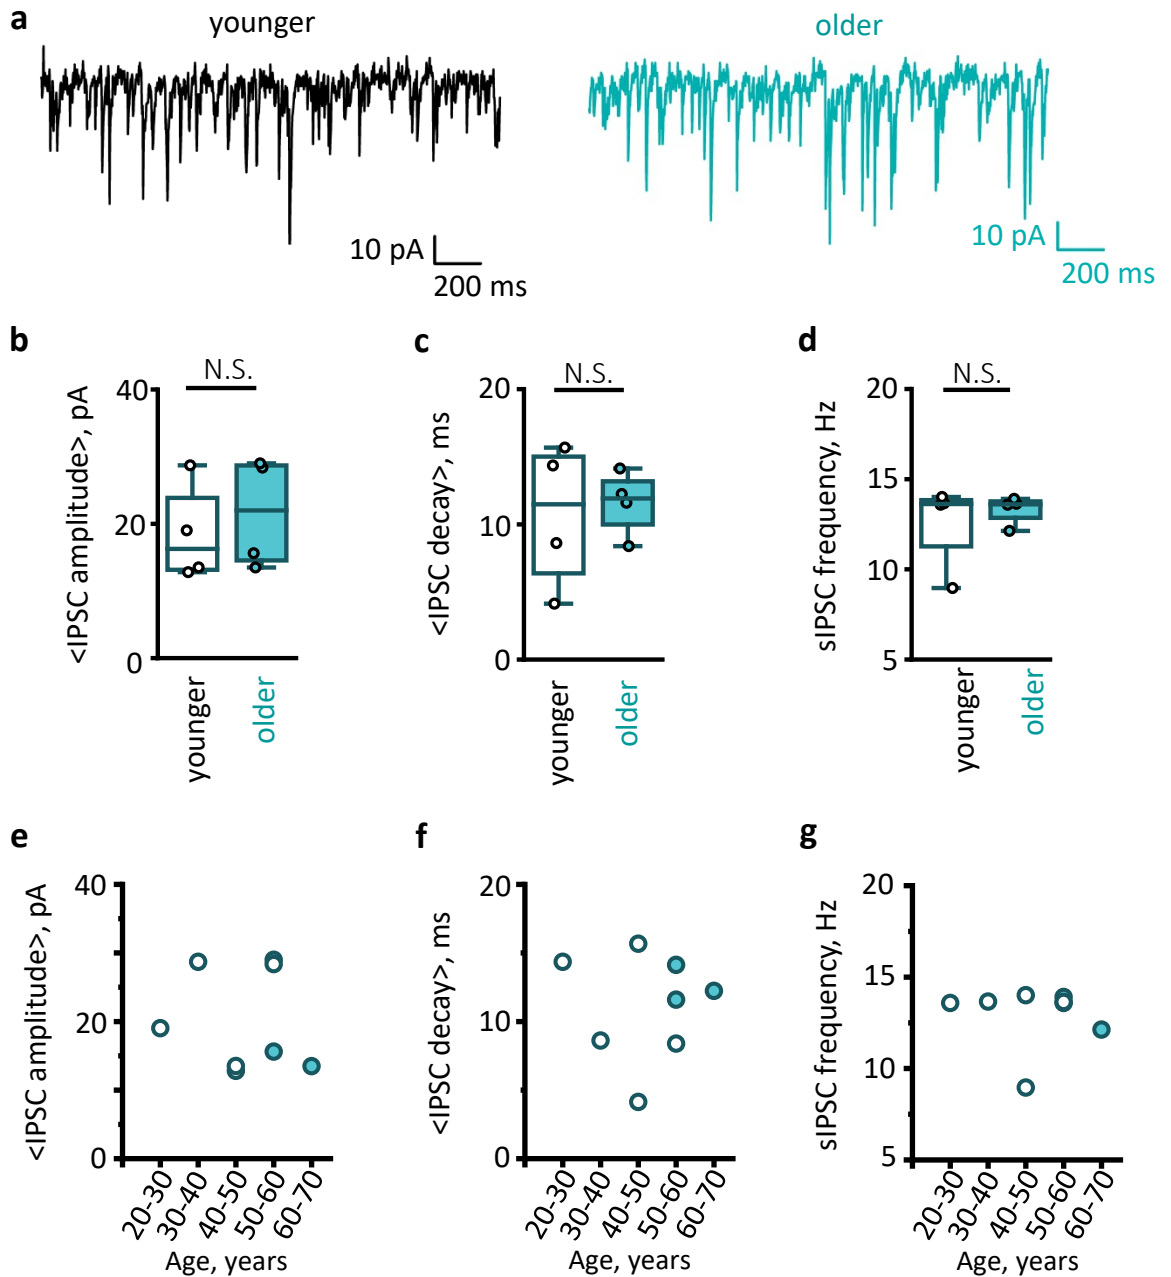

**Supplementary Figure 7. Aging does not affect sIPSCs in cortical pyramidal neurons.**

**a.** sIPSC recorded in voltage clamp mode in cortical pyramidal neurons. **b.** Mean amplitudes of sIPSCs in individual cells ( $p = 0.67$ ), **c.** mean sIPSC decays ( $p = 0.89$ ) and **d.** sIPSCs frequencies ( $p = 0.89$ ) in two age groups (younger adults:  $N = 4$  people; older adults:  $N = 4$  people; cell number  $n = N$ ). Data are shown as box-and-whisker plots where the box is Q1 and Q3 with median, whiskers are the ranges within 1.5IQR. Empty boxes/circles – younger adults, filled boxes/circles – older adults. Mann-Whitney test. N.S. –  $p > 0.05$ . **e, f, g.** same as on panels b, c, d for patients of different age groups. Empty circles are females, filled circles are males.
