# Supplementary material for: Mitochondrial malfunction and atrophy of astrocytes in the aged human cerebral cortex
Source: PubMed Central journal article supplement (PMC10725430; doi:10.1038/s41467-023-44192-0), 2023-12-16
Supplement: 41467_2023_44192_MOESM2_ESM.pdf [file 41467_2023_44192_MOESM2_ESM.pdf]

## Reporting Summary

Nature Portfolio wishes to improve the reproducibility of the work that we publish. This form provides structure for consistency and transparency in reporting. For further information on Nature Portfolio policies, see our [Editorial Policies](#) and the [Editorial Policy Checklist](#).

### Statistics

For all statistical analyses, confirm that the following items are present in the figure legend, table legend, main text, or Methods section.

n/a Confirmed

- The exact sample size ( $n$ ) for each experimental group/condition, given as a discrete number and unit of measurement
- A statement on whether measurements were taken from distinct samples or whether the same sample was measured repeatedly
- The statistical test(s) used AND whether they are one- or two-sided  
*Only common tests should be described solely by name; describe more complex techniques in the Methods section.*
- A description of all covariates tested
- A description of any assumptions or corrections, such as tests of normality and adjustment for multiple comparisons
- A full description of the statistical parameters including central tendency (e.g. means) or other basic estimates (e.g. regression coefficient) AND variation (e.g. standard deviation) or associated estimates of uncertainty (e.g. confidence intervals)
- For null hypothesis testing, the test statistic (e.g.  $F$ ,  $t$ ,  $r$ ) with confidence intervals, effect sizes, degrees of freedom and  $P$  value noted  
*Give  $P$  values as exact values whenever suitable.*
- For Bayesian analysis, information on the choice of priors and Markov chain Monte Carlo settings
- For hierarchical and complex designs, identification of the appropriate level for tests and full reporting of outcomes
- Estimates of effect sizes (e.g. Cohen's  $d$ , Pearson's  $r$ ), indicating how they were calculated

*Our web collection on [statistics for biologists](#) contains articles on many of the points above.*

### Software and code

Policy information about [availability of computer code](#)

Data collection

The data were collected with standard software supplied with respective equipment, except electrophysiology data recorded with WinWCP v5.2.5 software (University of Strathclyde, UK).

Data analysis

Raman spectra were analyzed with the open-source software Pyraman (DOI: 10.5281/zenodo.10151752)  
Electrophysiological recordings were analyzed with the Clampfit 10.4 software (Molecular Devices, USA).  
For astrocytes morphometry, we used custom code Image-funcut (DOI: 10.5281/zenodo.10151748).  
Astrocyte branches were traced with the Simple neurite tracer plugin (<https://github.com/morphonets/SNT>) for ImageJ version 1.53 (NIH, Bethesda, USA).  
The protein bands' intensity was quantified gel analyzer option of mageJ version 1.53 (NIH, Bethesda, USA)

For manuscripts utilizing custom algorithms or software that are central to the research but not yet described in published literature, software must be made available to editors and reviewers. We strongly encourage code deposition in a community repository (e.g. GitHub). See the Nature Portfolio [guidelines for submitting code & software](#) for further information.

## Data

Policy information about [availability of data](#)

All manuscripts must include a [data availability statement](#). This statement should provide the following information, where applicable:

- Accession codes, unique identifiers, or web links for publicly available datasets
- A description of any restrictions on data availability
- For clinical datasets or third party data, please ensure that the statement adheres to our [policy](#)

All data generated or analyzed during this study are included in the manuscript and supporting files.

## Human research participants

Policy information about [studies involving human research participants and Sex and Gender in Research](#).

### Reporting on sex and gender

The samples were collected from both sexes. The gender information was not collected. Due to the limited sample size, statistical comparison of males and females was impossible, and the results were put together. Individual recordings from males and females are presented in supplementary figures and marked in Supporting files.

### Population characteristics

The specimens of neocortical tissue were obtained during tumor resection from 42 patients in the range of ages from 18 to 71 years.

### Recruitment

The patients undergoing tumor resection were routinely asked for informed consent to use their access tissue for research. Such methods or recruitment may introduce self-selection bias since volunteers may differ from those who chose not to participate in research. However, the absolute majority (over 90%) of the patients agreed to participate in the research. Thus, we don't assume significant self-selection bias in the current study. However, since the study was performed on the patients, the results may differ from those of the healthy population and reflect the effect of the tumor on the brain tissue.

### Ethics oversight

Ethical Committee of the Privolzhsky Federal Research Medical Centre of the Ministry of Health of the Russian Federation

Note that full information on the approval of the study protocol must also be provided in the manuscript.

## Field-specific reporting

Please select the one below that is the best fit for your research. If you are not sure, read the appropriate sections before making your selection.

Life sciences  Behavioural & social sciences  Ecological, evolutionary & environmental sciences

For a reference copy of the document with all sections, see [nature.com/documents/nr-reporting-summary-flat.pdf](https://www.nature.com/documents/nr-reporting-summary-flat.pdf)

## Life sciences study design

All studies must disclose on these points even when the disclosure is negative.

### Sample size

No statistical method was used to determine the sample size. The sample size was determined by the availability of the access tissue.

### Data exclusions

No data were excluded from the analysis.

### Replication

To ensure the reproducibility of experimental findings, we share processed experimental data and custom codes used in this study.

### Randomization

Samples were divided into two groups: younger (18 - 50 years) and older (51 - 71 years) adult patients. Covariates control was not performed in our study.

### Blinding

The experimenters were not blinded. The experimenter was informed in advance of the type of planned neurosurgery, including the patient's age, to apply for tissue collection knowingly.

## Reporting for specific materials, systems and methods

We require information from authors about some types of materials, experimental systems and methods used in many studies. Here, indicate whether each material, system or method listed is relevant to your study. If you are not sure if a list item applies to your research, read the appropriate section before selecting a response.

## Materials &amp; experimental systems

## Methods

| n/a                                 | Involvement                         | System                        |
|-------------------------------------|-------------------------------------|-------------------------------|
| <input type="checkbox"/>            | <input checked="" type="checkbox"/> | Antibodies                    |
| <input checked="" type="checkbox"/> | <input type="checkbox"/>            | Eukaryotic cell lines         |
| <input checked="" type="checkbox"/> | <input type="checkbox"/>            | Palaeontology and archaeology |
| <input checked="" type="checkbox"/> | <input type="checkbox"/>            | Animals and other organisms   |
| <input checked="" type="checkbox"/> | <input type="checkbox"/>            | Clinical data                 |
| <input checked="" type="checkbox"/> | <input type="checkbox"/>            | Dual use research of concern  |

| n/a                                 | Involvement              | Method                 |
|-------------------------------------|--------------------------|------------------------|
| <input checked="" type="checkbox"/> | <input type="checkbox"/> | ChIP-seq               |
| <input checked="" type="checkbox"/> | <input type="checkbox"/> | Flow cytometry         |
| <input checked="" type="checkbox"/> | <input type="checkbox"/> | MRI-based neuroimaging |

## Antibodies

## Antibodies used

Raman microspectrometry  
 GFAP, Abcam, ab7260, polyclonal, rabbit  
 Secondary Cy™2 AffiniPure donkey anti-rabbit IgG (H+L), Jackson ImmunoResearch, 711-225-152, polyclonal  
 NeuN, Novus Biologicals, NBP2-10491, chicken, polyclonal  
 Secondary Cy5 AffiniPure donkey anti-chicken IgG (H+L), Jackson ImmunoResearch, polyclonal

Immunocytochemical analysis  
 Ezrin, Diagnostic Biosystems, Mob380, monoclonal, clone 3C12, mouse  
 GFAP, Biocare Medical, CM065, monoclonal, clone GA-5, mouse

Western blotting  
 GFAP, Antibodies-online, ABIN3044350, polyclonal, rabbit  
 Peroxidase AffiniPure Donkey Anti-Mouse IgG (H+L), Jackson immunoresearch, 715-035-150, polyclonal  
 Ezrin, Antibodies-online, ABIN5542456, monoclonal, clone 6F1A9, mouse  
 Goat Anti-Rabbit IgG H&L (HRP), Abcam, ab6721, polyclonal  
 GS, Synaptic Systems, 367 005, polyclonal, guinea pig  
 Peroxidase AffiniPure Donkey Anti-Guinea Pig IgG (H+L), Jackson ImmunoResearch, 706-035-148, polyclonal

## Validation

Validation information and relevant references are provided on manufacturer's websites  
 GFAP, Abcam, ab7260, polyclonal, rabbit  
<https://www.abcam.com/products/primary-antibodies/gfap-antibody-ab7260.html>  
 RRID: AB\_305808  
 Secondary Cy™2 AffiniPure Donkey Anti-Rabbit IgG (H+L), Jackson ImmunoResearch, 711-225-152, polyclonal  
<https://www.jacksonimmuno.com/catalog/products/711-225-152>  
 RRID: AB\_2340612  
 NeuN, Novus Biologicals, NBP2-10491, chicken, polyclonal  
[http://www.novusbio.com/products/rbfox3-neun-antibody\\_nbp2-10491](http://www.novusbio.com/products/rbfox3-neun-antibody_nbp2-10491)  
 RRID: AB\_3075454  
 Secondary Cy5 AffiniPure donkey anti-chicken IgG (H+L), Jackson ImmunoResearch, , polyclonal  
<https://www.jacksonimmuno.com/catalog/products/703-175-155>  
 RRID: AB\_2340365  
 Ezrin, Diagnostic Biosystems, Mob380, monoclonal, clone 3C12, mouse  
[https://dbiosys.com/product/ezrin-p81-cytovillin?attribute\\_pa\\_volume=concentrated-1-ml-2](https://dbiosys.com/product/ezrin-p81-cytovillin?attribute_pa_volume=concentrated-1-ml-2)  
 RRID: AB\_3075452  
 GFAP, Biocare Medical, CM065, monoclonal, clone GA-5, mouse  
<https://biocare.net/product/glia-fibrillary-acidic-protein-antibody-2/>  
 RRID: AB\_3075453  
 GFAP - Antibodies-online, ABIN3044350, polyclonal, rabbit  
<https://www.antibodies-online.com/antibody/3044350/anti-Glia+Fibrillary+Acidic+Protein+GFAP+AA+417-432,+C-Term+antibody/>  
 RRID: AB\_3075450  
 Secondary Peroxidase AffiniPure Donkey Anti-Mouse IgG (H+L), Jackson immunoresearch, 715-035-150, polyclonal  
<https://www.jacksonimmuno.com/catalog/products/715-035-150>  
 RRID: AB\_2340770  
 Ezrin - Antibodies-online, ABIN5542456, monoclonal, clone 6F1A9, mouse  
<https://www.antibodies-online.com/antibody/5542456/anti-Ezrin+EZR+AA+292-464+antibody/>  
 RRID: AB\_3075451  
 Secondary Goat Anti-Rabbit IgG H&L (HRP), Abcam, ab6721, polyclonal  
<https://www.abcam.com/products/secondary-antibodies/goat-rabbit-igg-hl-hrp-ab6721.html>  
 RRID: AB\_955447  
 GS - Synaptic Systems, 367 005, polyclonal, guinea pig  
<https://www.sysy.com/product/367005>  
 RRID: AB\_2620128  
 Secondary Peroxidase AffiniPure Donkey Anti-Guinea Pig IgG (H+L), Jackson ImmunoResearch, 706-035-148, polyclonal  
<https://www.jacksonimmuno.com/catalog/products/706-035-148>
